# Supplementary material for: Age‐Dependent Relationship of Hypertension Subtypes With Incident Heart Failure
Source: PubMed Central journal article supplement — J Am Heart Assoc. 2022 Apr 27;11(9):e025406. doi: 10.1161/JAHA.121.025406 (PMC9238621; doi:10.1161/jaha.121.025406), 2022-04-27

## **SUPPLEMENTAL MATERIAL**

### **Data S1. Methods of Blood Pressure Measurement**

- 1.** The auscultation method should use an accurately calibrated mercury or aneroid sphygmomanometer. A calibrated electronic sphygmomanometer can also be used.
- 2.** Healthcare professionals should choose the correct cuff size and wrap the cuff around the arm, with the center of the cuff bladder over the brachial artery. The stethoscope, standard sphygmomanometers, and cuff and bulb should be checked regularly to ensure that BP measurements have a standardized high level of accuracy and precision. The appropriate BP cuff size should be determined by measuring the participant's arm circumference at the mid-point between the acromion and olecranon. A cuff with a bladder 13 cm wide and 22–24 cm long should be used for the auscultation method. A pediatric cuff should be used for a brachial girth less than 27 cm, and a large adult cuff for an arm girth  $\geq 34$  cm.
- 3.** Caffeine, eating, heavy physical activity, smoking, and talking should be avoided before measurement.
- 4.** Research staff should measure right-arm brachial artery blood pressure two times after the participant had been sitting in a quiet room for 5 minutes in a seated position on a chair with back support and the participant's legs uncrossed. The inner aspect of the bend at the elbow (cubital fossa) should be maintained at heart level.
- 5.** Measurement: The cuff should rapidly be inflated while palpating the radial or brachial artery, and the stethoscope should be used after blood pressure has risen to 20-30 mmHg or more above the pulse rate disappearing level. The cuff should be slowly deflated (2 mmHg per second). Staff should record the 1st and 5th Korotkoff sounds, rounding the pressure in mmHg to the nearest even number and recording it.
- 6.** The measurements should be performed two times at an interval of  $\geq 1$  min, and the mean value of two measurements that provide stable values (difference in the values:  $<5$  mmHg) should be used for the analyses.

**Data S2. ICD-10 Codes**

**Heart Failure:** I500, I501, I509, and I110

**Myocardial Infarction:** I210–I214, and I219

**Angina Pectoris:** I200, I201, I208, and I209

**Stroke:** I630, I631–I636, I638, I639, I600–I611, I613–I616, I619, I629, and G459

**Atrial Fibrillation:** I480–I484, and I489

**Table S1. Relative Risk Reduction of Hypertension Subtype for Heart Failure and Other Cardiovascular Disease**

|                                 | 20-49 Years<br>(n=1,825,756) | 50-59 Years<br>(n=571,574) | 60-75 Years<br>(n=215,240) |
|---------------------------------|------------------------------|----------------------------|----------------------------|
| <b>Heart Failure</b>            |                              |                            |                            |
| Stage 1 Hypertension            | 26.1 (23.5-28.6)             | 21.7 (18.5-24.7)           | 12.2 (7.0-17.1)            |
| Isolated Diastolic Hypertension | 50.7 (47.3-53.8)             | 38.7 (34.2-43.0)           | 26.3 (16.2-35.2)           |
| Isolated Systolic Hypertension  | 48.9 (44.9-52.6)             | 41.7 (37.5-45.7)           | 30.6 (25.1-35.8)           |
| Systolic Diastolic Hypertension | 67.7 (66.1-69.2)             | 52.9 (50.4-55.3)           | 41.8 (37.3-45.9)           |
| <b>Myocardial Infarction</b>    |                              |                            |                            |
| Stage 1 Hypertension            | 26.2 (18.3-33.4)             | 35.9 (28.3-42.6)           | 17.4 (2.0-30.4)            |
| Isolated Diastolic Hypertension | 45.2 (33.6-54.8)             | 38.3 (24.3-49.7)           | 50.9 (32.8-64.2)           |
| Isolated Systolic Hypertension  | 54.9 (44.4-63.4)             | 47.4 (35.6-57.0)           | 24.7 (4.2-40.9)            |
| Systolic Diastolic Hypertension | 59.0 (52.6-64.5)             | 47.5 (38.8-55.0)           | 40.1 (25.1-52.1)           |
| <b>Angina Pectoris</b>          |                              |                            |                            |
| Stage 1 Hypertension            | 18.0 (15.3-20.6)             | 15.7 (12.4-18.8)           | 10.5 (5.1-15.5)            |
| Isolated Diastolic Hypertension | 33.7 (29.0-38.0)             | 28.6 (23.3-33.5)           | 14.0 (1.2-25.1)            |
| Isolated Systolic Hypertension  | 39.5 (34.7-43.9)             | 30.6 (25.5-35.4)           | 14.9 (7.6-21.7)            |
| Systolic Diastolic Hypertension | 47.5 (44.7-50.2)             | 37.5 (34.1-40.7)           | 23.0 (16.5-29.0)           |
| <b>Stroke</b>                   |                              |                            |                            |
| Stage 1 Hypertension            | 28.6 (24.8-32.2)             | 21.9 (17.7-25.9)           | 13.9 (7.5-19.9)            |
| Isolated Diastolic Hypertension | 55.4 (50.9-59.5)             | 41.5 (35.7-46.7)           | 33.3 (22.0-43.0)           |
| Isolated Systolic Hypertension  | 42.6 (35.0-49.3)             | 29.6 (22.1-36.3)           | 23.3 (15.4-30.5)           |
| Systolic Diastolic Hypertension | 70.6 (68.5-72.6)             | 56.1 (53.1-58.9)           | 45.5 (40.4-50.2)           |
| <b>Atrial Fibrillation</b>      |                              |                            |                            |
| Stage 1 Hypertension            | 19.7 (13.6-25.5)             | 17.5 (11.0-23.5)           | 3.7 (-6.6 - +13.0)         |

|                                 |                  |                  |                  |
|---------------------------------|------------------|------------------|------------------|
| Isolated Diastolic Hypertension | 29.8 (18.3-39.6) | 31.1 (21.2-39.8) | 37.0 (23.4-48.3) |
| Isolated Systolic Hypertension  | 35.1 (22.4-45.7) | 35.3 (25.5-43.9) | 15.2 (2.2-26.5)  |
| Systolic Diastolic Hypertension | 50.5 (44.6-55.8) | 37.3 (30.4-43.5) | 25.9 (15.3-35.2) |

---

The relative risk reduction (%) of hypertension subtypes for heart failure and other cardiovascular events was calculated after adjusting for covariates including age, sex, obesity, diabetes mellitus, dyslipidemia, cigarette smoking, and alcohol consumption.

**Table S2. Relative Risk Reduction of Hypertension Subtype for Heart Failure Stratified by Sex**

|                                 | Men                          |                            |                            | Women                      |                            |                           |
|---------------------------------|------------------------------|----------------------------|----------------------------|----------------------------|----------------------------|---------------------------|
|                                 | 20-49 Years<br>(n=1,003,021) | 50-59 Years<br>(n=313,155) | 60-75 Years<br>(n=121,082) | 20-49 Years<br>(n=822,735) | 50-59 Years<br>(n=258,419) | 60-75 Years<br>(n=94,158) |
| Heart Failure                   |                              |                            |                            |                            |                            |                           |
| Stage 1 Hypertension            | 26.1<br>(22.9-29.0)          | 21.7<br>(17.8-25.3)        | 9.8<br>(3.1-15.9)          | 26.9<br>(22.3-31.3)        | 22.4<br>(16.8-27.7)        | 16.3<br>(7.7-24.1)        |
| Isolated Diastolic Hypertension | 50.8<br>(47.1-54.3)          | 38.2<br>(33.1-42.9)        | 21.5<br>(9.1-32.2)         | 49.6<br>(41.4-56.7)        | 43.2<br>(32.9-52.0)        | 40.8<br>(22.4-54.8)       |
| Isolated Systolic Hypertension  | 49.6<br>(44.8-54.0)          | 44.2<br>(39.0-49.0)        | 30.0<br>(22.8-36.5)        | 48.6<br>(41.4-55.1)        | 37.4<br>(29.5-44.3)        | 31.1<br>(22.0-39.2)       |
| Systolic Diastolic Hypertension | 68.3<br>(66.5-70.0)          | 53.6<br>(50.8-56.3)        | 41.7<br>(36.4-46.5)        | 65.9<br>(62.4-69.0)        | 50.9<br>(45.8-55.6)        | 40.5<br>(31.4-48.3)       |

The relative risk reduction (%) of hypertension subtypes for heart failure and other cardiovascular events was calculated after adjusting for covariates including age, obesity, diabetes mellitus, dyslipidemia, cigarette smoking, and alcohol consumption.

**Figure S1A. Hypertension Subtype and Heart Failure Event in Men**

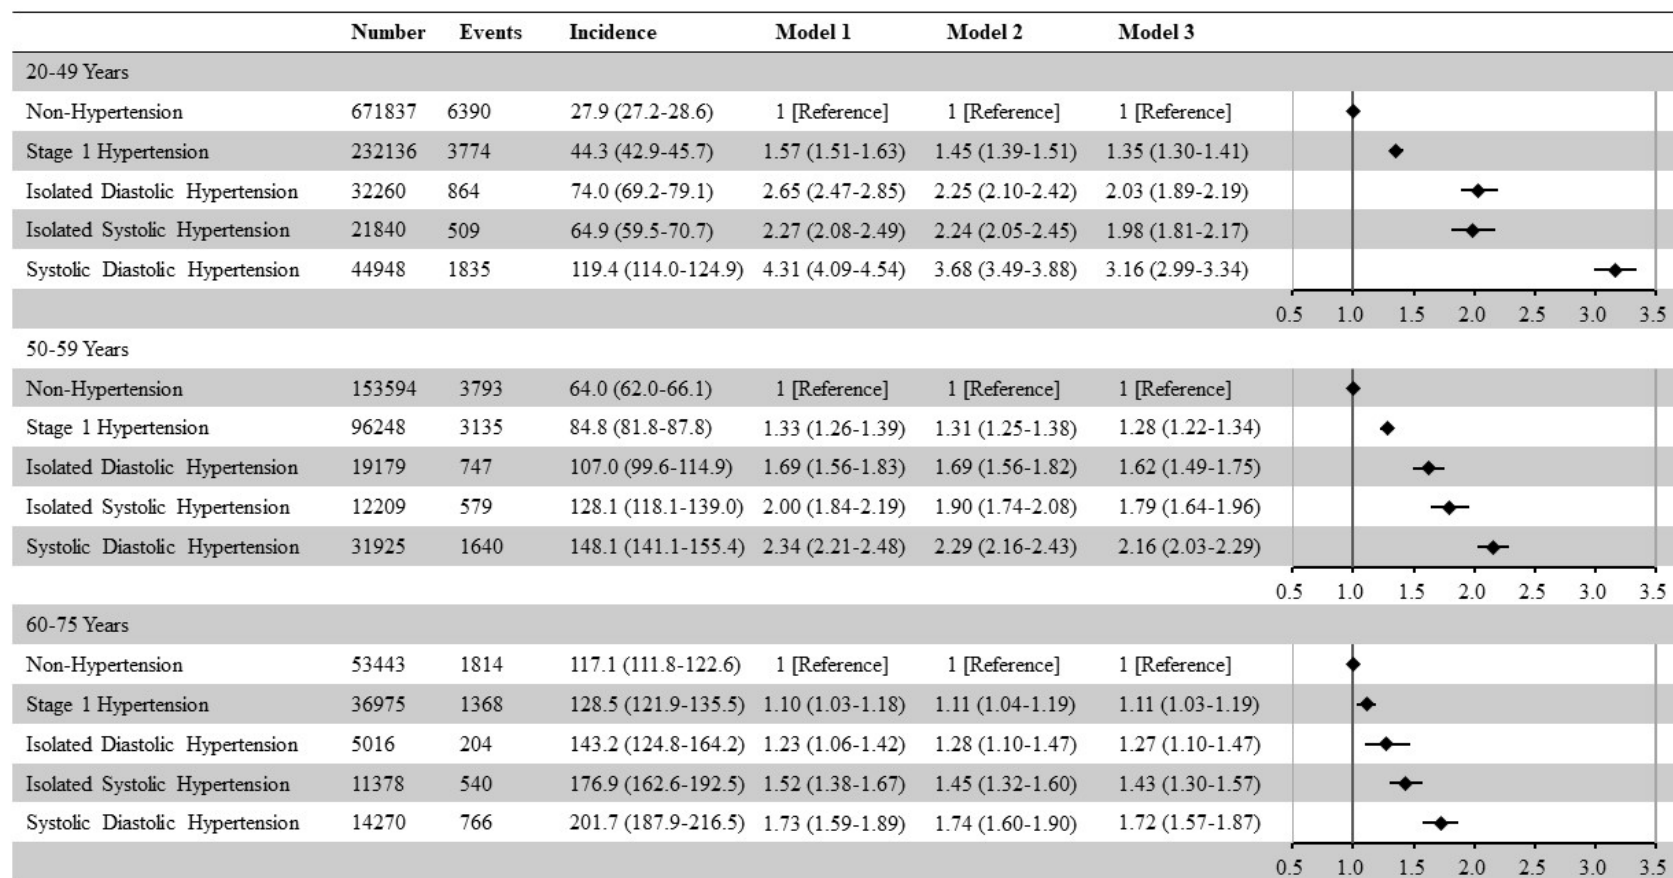

**Figure S1B. Hypertension Subtype and Heart Failure Event in Women**

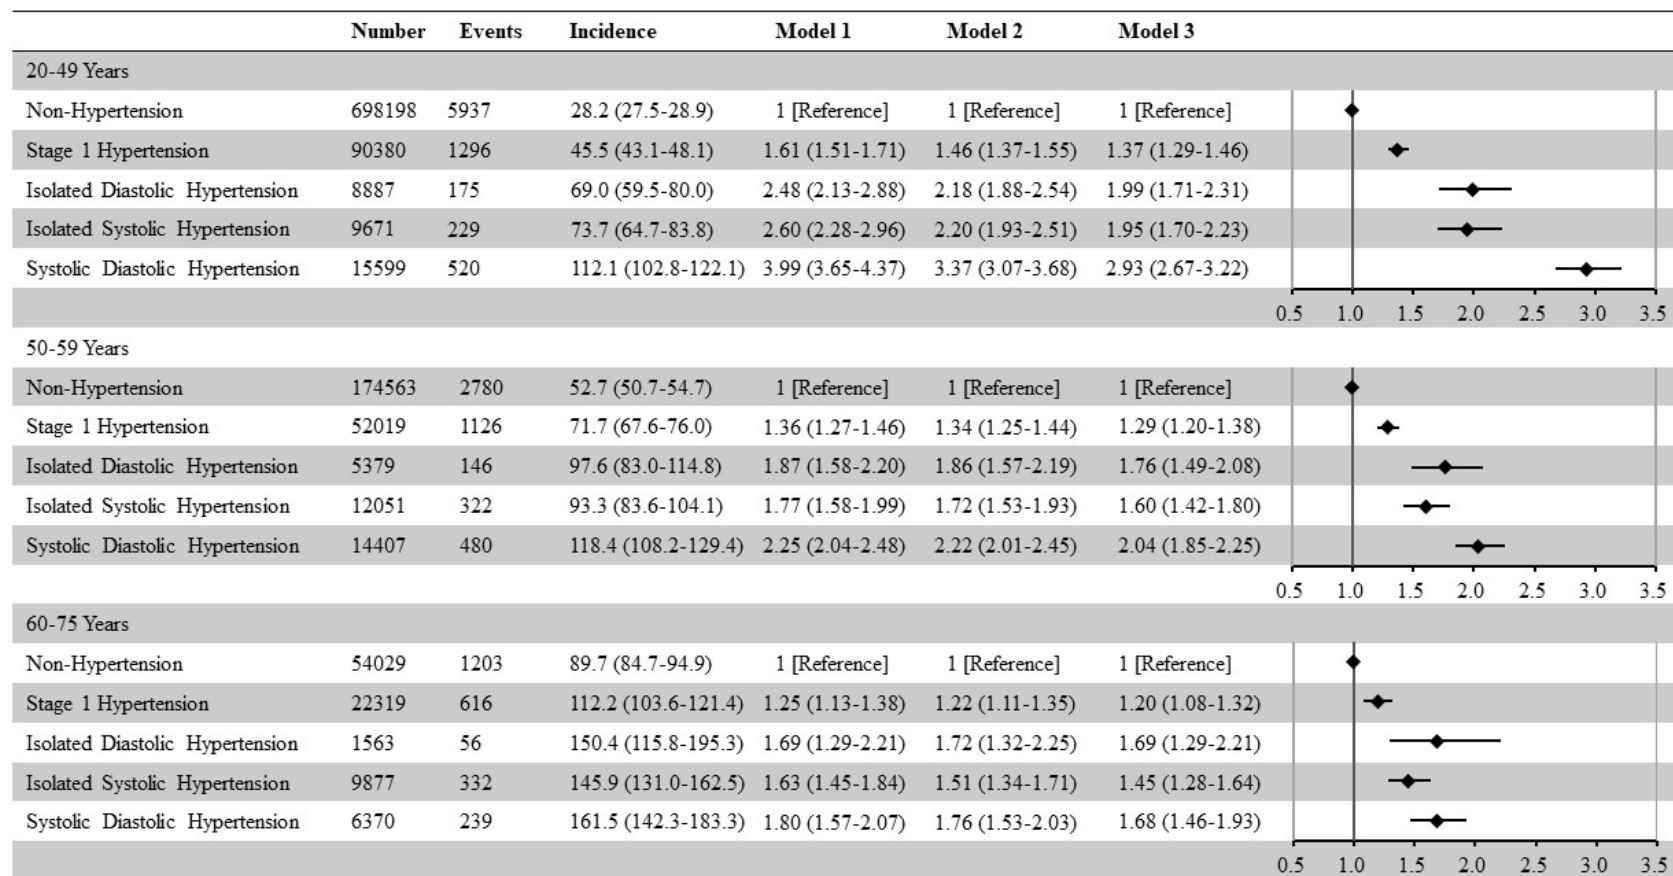



**Figure S2. Hypertension Subtype and Heart Failure Event**

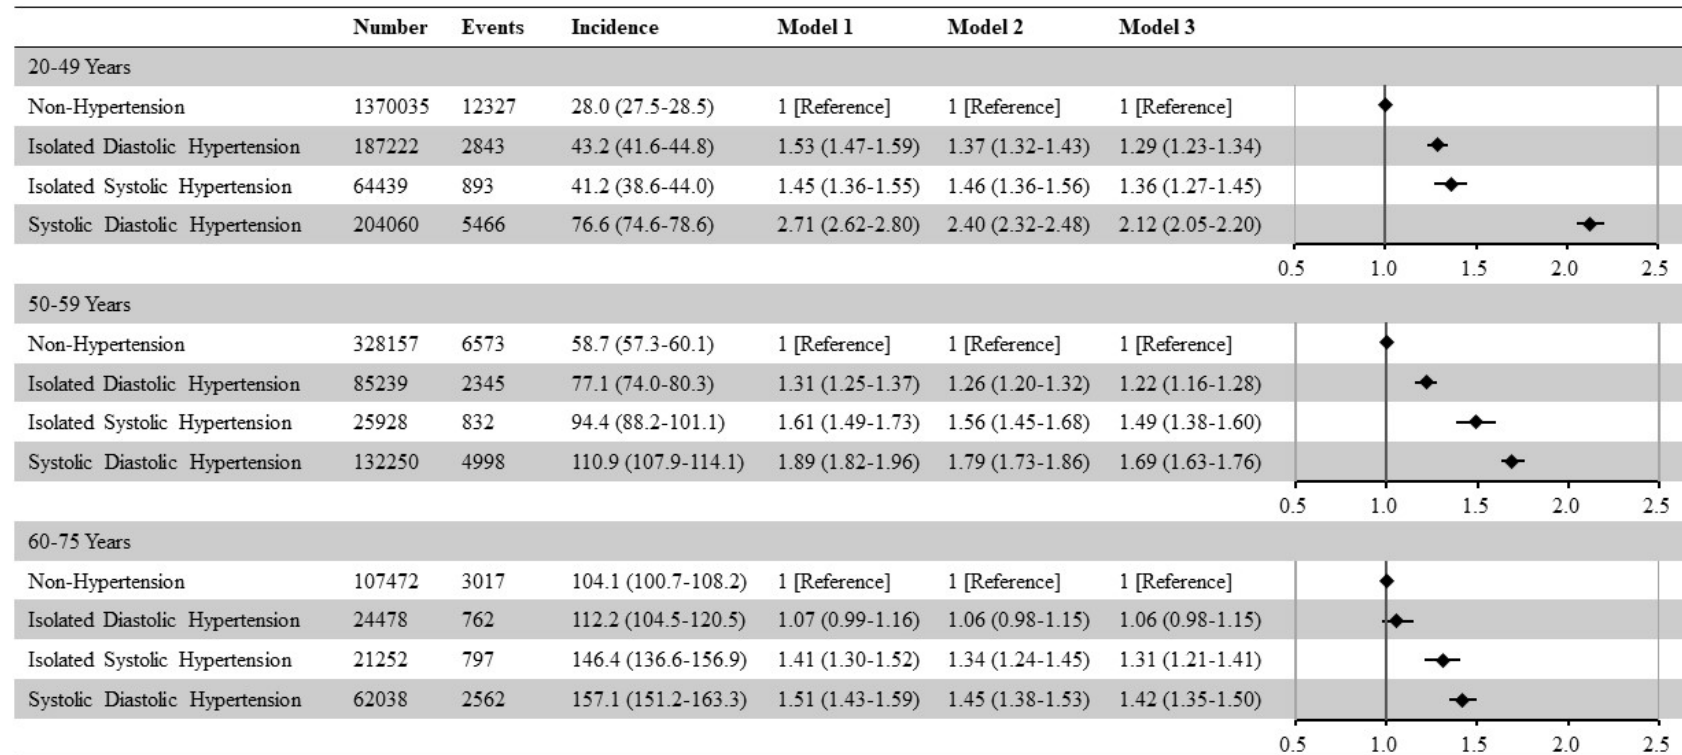

**Figure S3. Hypertension Subtype and Heart Failure Event**

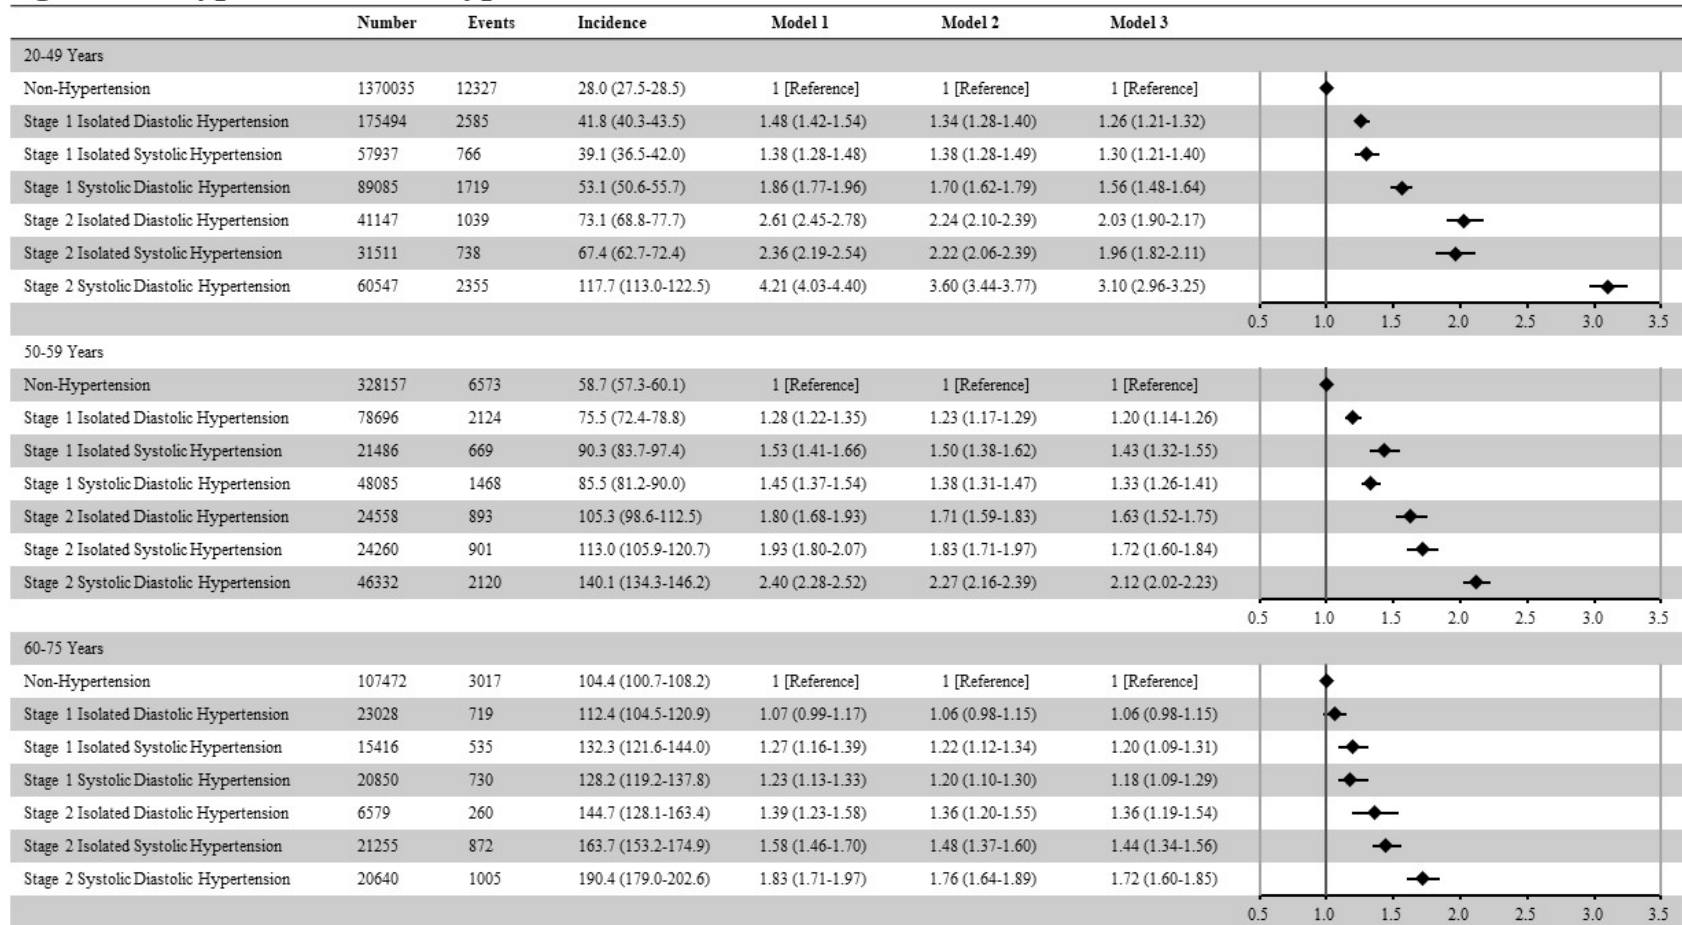

**Figure S4. Hypertension Subtype and Heart Failure Event**

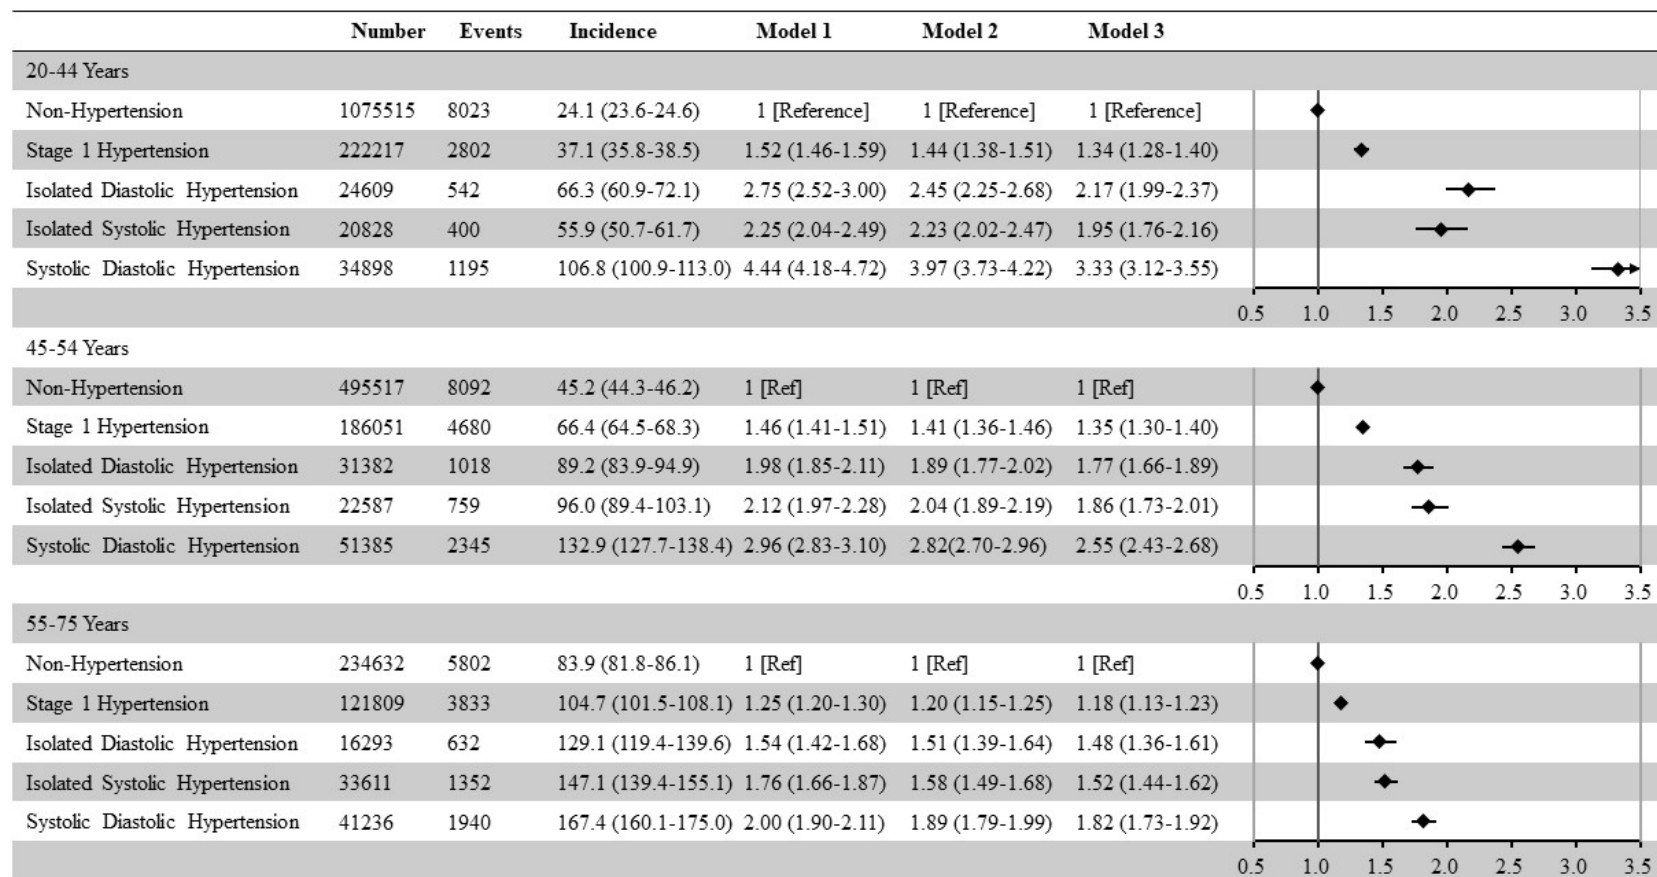

**Figure S5. Hypertension Subtype and Heart Failure Event**

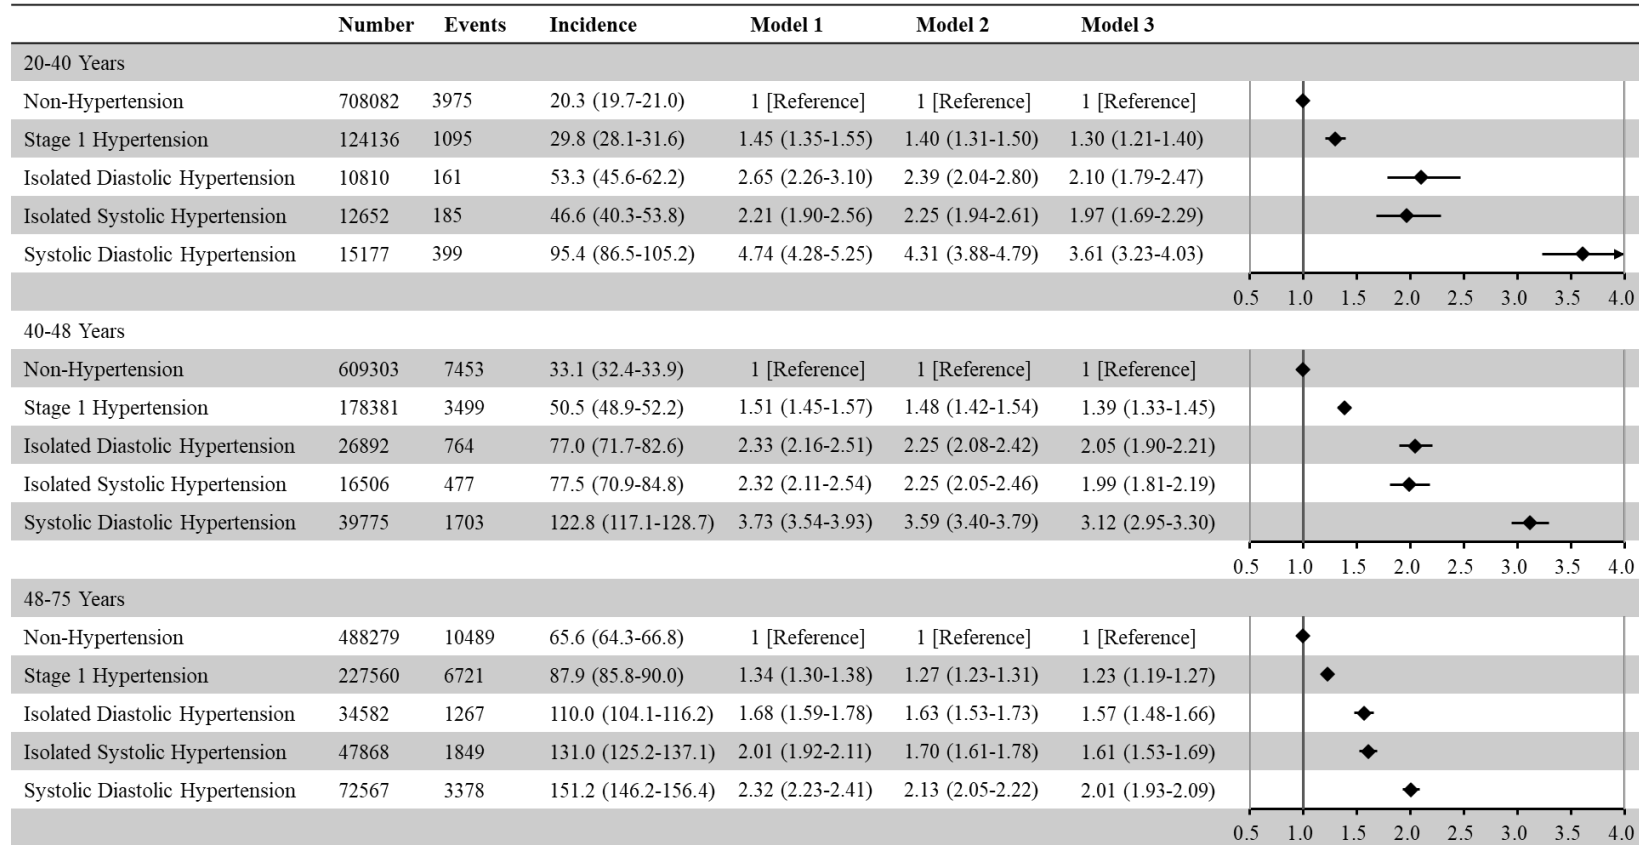

**Figure S6. Hypertension Subtype and Heart Failure Event (adjusted for estimated glomerular filtration rate)**

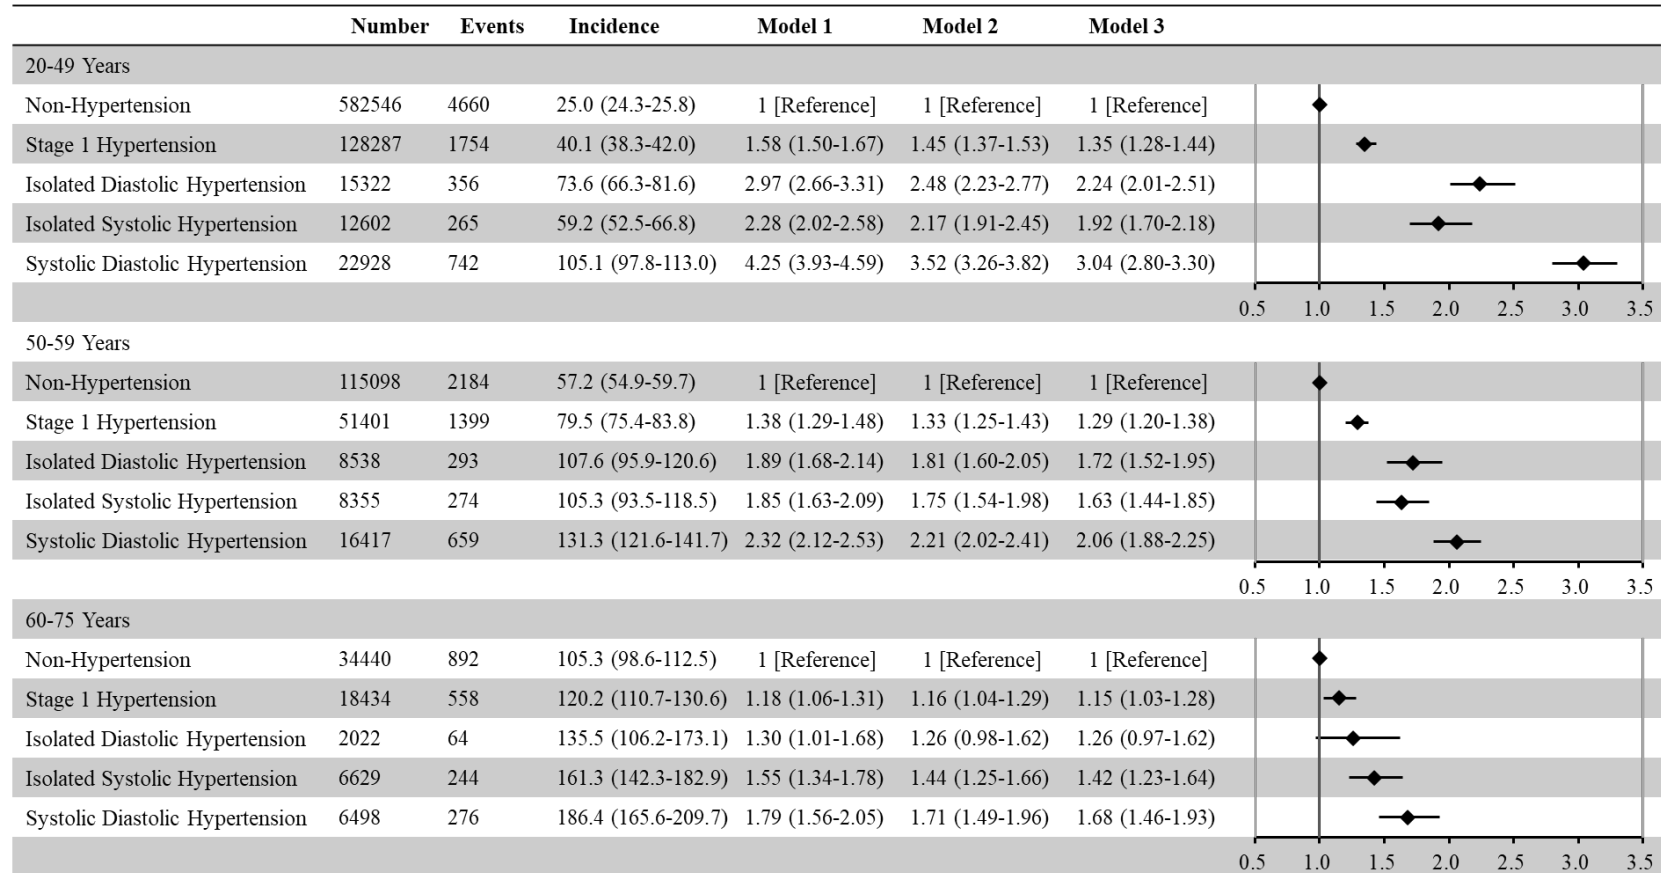

**Figure S7. Hypertension Subtype and All-Cause Death**

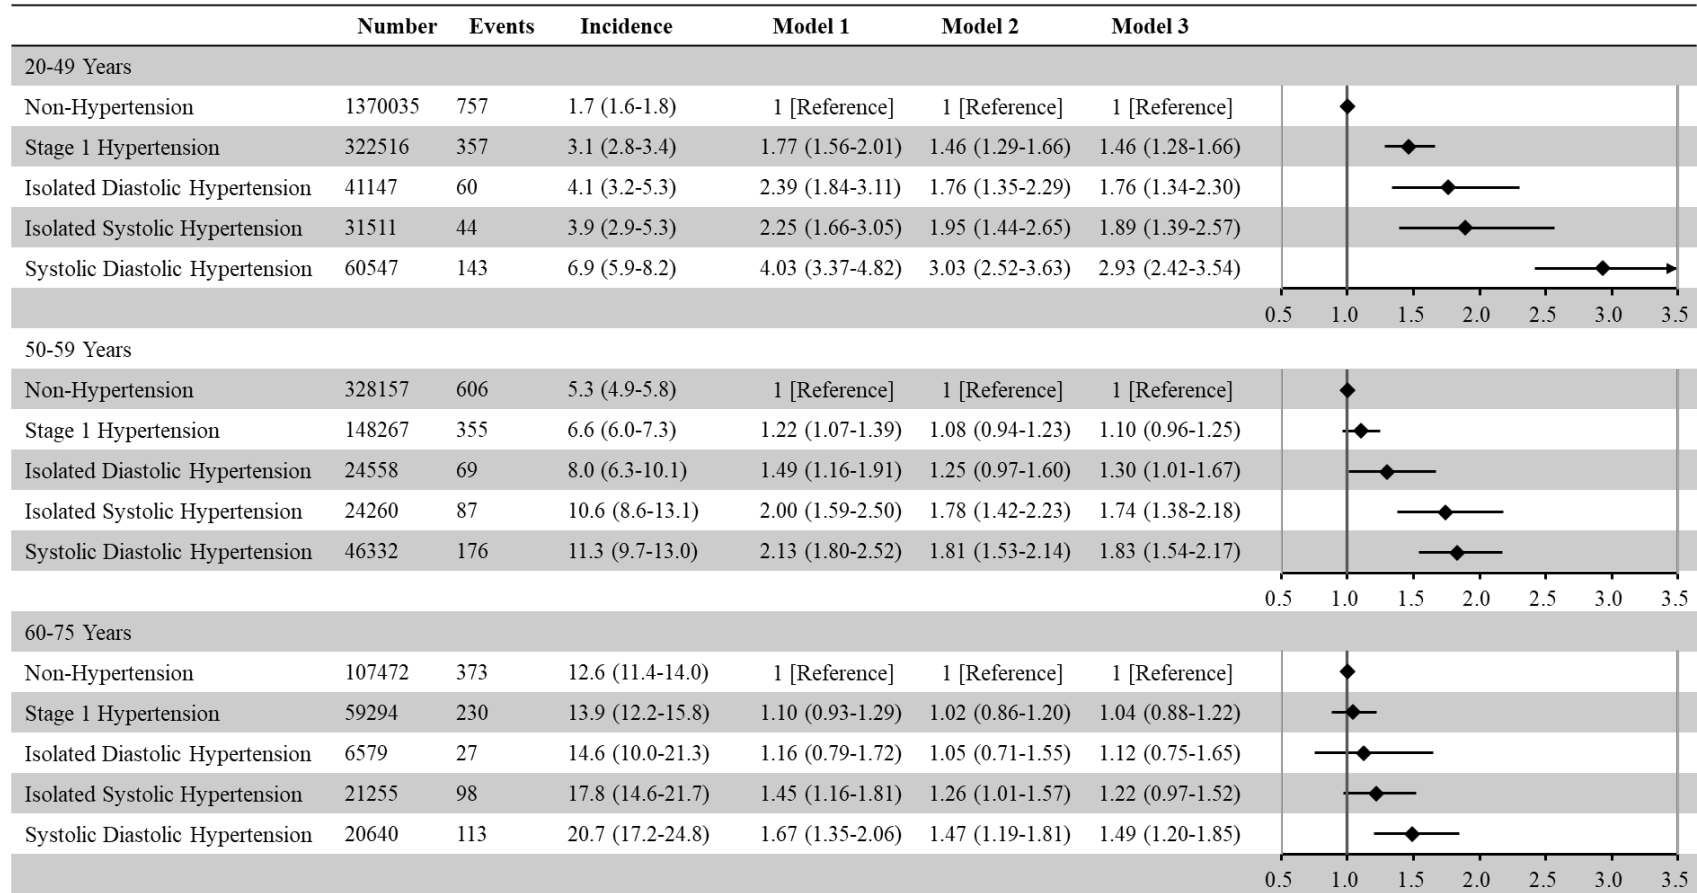

**Figure S8. Population Attributable Fraction**

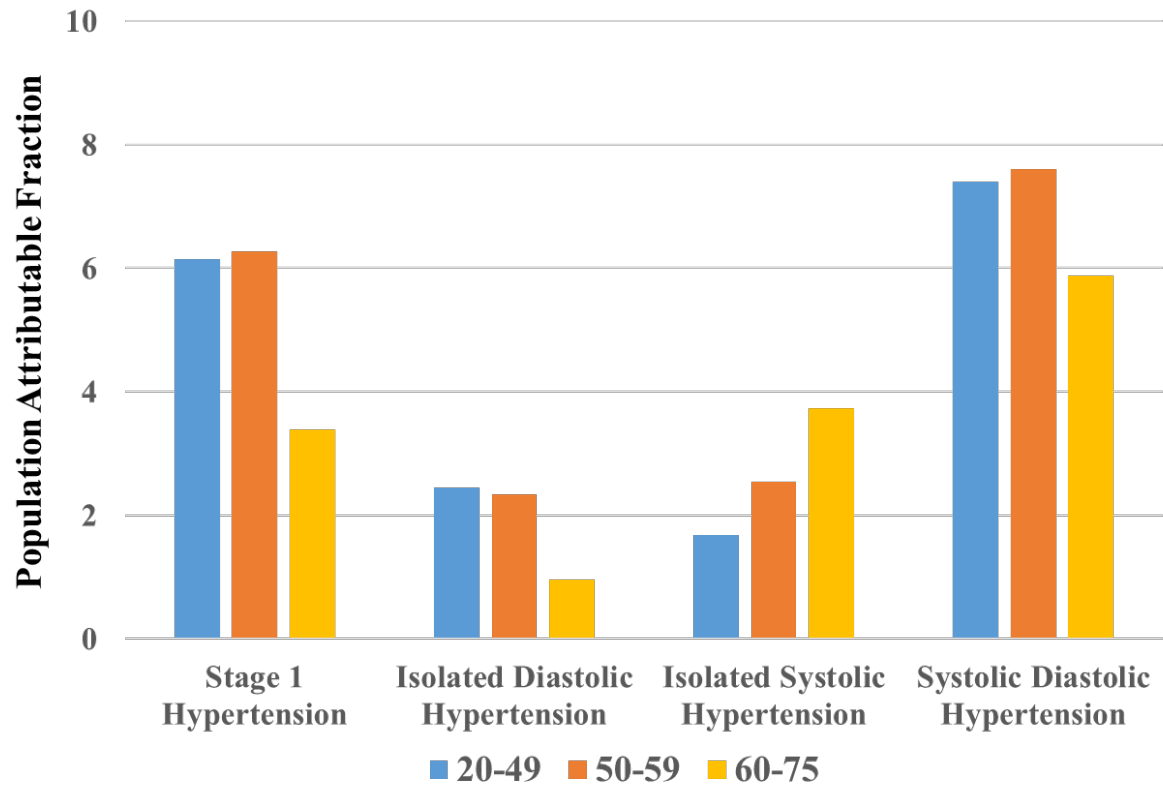

Supplement: JAH3-11-e025406-s001.pdf [file JAH3-11-e025406-s001.pdf]
